1           **Efficient long fragment editing technique enables rapid construction of**

2                                           **genetically stable bacterial strains**

3           Chaoyong Huang<sup>1,2,#</sup>, Liwei Guo<sup>1,#</sup>, Jingge Wang<sup>1</sup>, Ning Wang<sup>1</sup>, Yi-Xin Huo<sup>1,2,\*</sup>

4

5           <sup>1</sup>Key Laboratory of Molecular Medicine and Biotherapy, School of Life Sciences,

6           Beijing Institute of Technology, No. 5 South Zhongguancun Street, Beijing, China,

7           100081

8           <sup>2</sup>SIP-UCLA Institute for Technology Advancement, 10 Yueliangwan Road, Suzhou

9           Industrial Park, Suzhou, China, 215123

10          <sup>#</sup>These authors contributed equally to this work: Chaoyong Huang, Liwei Guo

11          <sup>\*</sup>To whom correspondence should be addressed. Email: huoyixin@bit.edu.cn. Phone

12          number: +86 18910254522

13

14 **Abstract**

15 **Background:** Bacteria are versatile living systems that enhance our understanding of  
16 nature and enable biosynthesis of valuable molecules. Long fragment editing  
17 techniques are of great importance for accelerating bacterial chromosome engineering  
18 to obtain desirable and genetically stable strains. However, the existing genomic  
19 editing methods cannot meet the needs of researchers.

20 **Results:** We herein report an efficient long fragment editing technique for complex  
21 chromosomal engineering in *Escherichia coli*. The technique enabled us to integrate  
22 DNA fragments up to 12 kb into the chromosome, and to knock out DNA fragments  
23 up to 187 kb from the chromosome, with over 95% positive rates. We applied this  
24 technique for *E. coli* chromosomal simplification, resulting in twelve individual  
25 deletion mutants and four cumulative deletion mutants. The simplest chromosome lost  
26 a 370.6 kb DNA sequence containing 364 open reading frames. In addition, we  
27 applied the technique to metabolic engineering and constructed a genetically stable  
28 plasmid-independent isobutanol production strain that produced 1.3 g/L isobutanol via  
29 shake-flask micro-aerobic fermentation.

30 **Conclusions:** These results suggested that the technique is a powerful chromosomal  
31 engineering tool, highlighting its potential to be applied in different fields of synthetic  
32 biology.

33

34 **Keywords:** chromosomal engineering, long fragment editing, genetic stability,  
35 genome simplification, metabolic engineering

36

## 37 **Background**

38 As a class of versatile living systems, bacteria are useful in many fields of synthetic  
39 biology. In bacteria, genetic information contained on the single-copy chromosome  
40 determines the characteristics of a specific strain. To understand bacterial  
41 characteristics and utilize them to explore the world and serve human life, researchers  
42 frequently conduct chromosomal engineering to reprogram the genetic information of  
43 bacteria. Through DNA editing, researchers can add desired exogenous genetic  
44 information to or delete unwanted endogenous genetic information from the bacterial  
45 chromosome. The long fragment editing technique is of great importance in  
46 accelerating bacterial chromosome engineering to obtain genetically stable strains.  
47 For example, the long fragment deletion technique can help to simplify the bacterial  
48 chromosome to explore the minimal genome of a specific strain [1, 2], and the long  
49 fragment insertion technique can help to expand the bacterial chromosome to archive  
50 the increasing information of the human world [3]. In metabolic engineering, plasmid  
51 maintenance requires continuous antibiotic use, which has led to biosafety issues and  
52 elevated industrial cost [4]. The long fragment editing technique is an ideal tool for  
53 constructing plasmid-independent and high-production strains.

54 To accelerate the process of chromosomal engineering, researchers have reported  
55 many methods for generating insertions and deletions in bacterial chromosome.  
56 Homologous recombination with polymerase chain reaction (PCR) fragments forms  
57 the basis of these methods [5, 6]. However, since RecA-mediated homologous

58 recombination with linear DNA is of low efficiency, researchers created the desired  
59 mutagenesis on a suitable plasmid before recombining it into the genome [7-9]. To  
60 enhance the efficiency of homologous recombination, the bacteriophage-derived  
61  $\lambda$ -Red system was introduced into bacteria on either the genome or plasmids.  
62 Genomic editing based on  $\lambda$ -Red recombinases is referred to as recombineering  
63 [10-12]. In recombineering, an antibiotic resistance gene is required as a selectable  
64 marker. To remove the selectable marker after genomic editing, researchers  
65 introduced counter-selection systems or site-specific recombination systems,  
66 including *FLP/FRT* and *Cre/loxP* [13, 14]. Though recombineering can handle the  
67 insertion and deletion of short DNA fragments [15-17], the editing efficiency  
68 decreases dramatically for long fragments [11]. Moreover, eliminating selectable  
69 markers and plasmids is complicated and time-consuming, and the residual *FRT* or  
70 *loxP* site may influence a new round of genomic editing [13]. Generating a  
71 double-strand break (DSB) in the target DNA is an effective strategy for improving  
72 the efficiency of long-fragment manipulations. Though the homing endonuclease  
73 I-SceI is efficient for cleaving double-stranded DNA (dsDNA), researchers had to  
74 integrate an 18-bp recognition site into the target DNA before inducing DNA cleavage  
75 [18-20]. Engineered endonucleases, such as zinc-finger nucleases (ZFNs) and  
76 transcription activator-like effector nucleases (TALENs), can be programmed to  
77 recognize and cleave the genome at a specific locus. However, these approaches  
78 require engineering new enzymes for each target sequence [21-24]. Recently,  
79 clustered regularly interspaced short palindromic repeats

80 (CRISPR)/CRISPR-associated protein 9 (Cas9) technology was developed based on  
81 research into the adaptive immune system of *Streptococcus pneumoniae* [25]. Cas9  
82 endonuclease complexed with a designed single-guide RNA (sgRNA) can generate  
83 DSB in a specific protospacer sequence where a proper protospacer-adjacent motif  
84 (PAM) exists [25-27]. The technique relies on sgRNA-directed cleavage at the target  
85 site to kill wild-type cells, thus circumventing the need for selectable markers or  
86 counter-selection systems. Changing the 20-bp spacer sequence can reprogram the  
87 specificity of the Cas9-sgRNA complex, making CRISPR/Cas9 technology much  
88 more convenient than ZFNs and TALENs. Many methods based on the CRISPR/Cas9  
89 technology are efficient for short-sequence editing in *Escherichia coli*. However, for  
90 long-fragment editing, the fragment length and editing efficiency still have much  
91 room for improvement.

92 We herein report an efficient long fragment editing technique for complex  
93 chromosome engineering in *E. coli*. The technique made full use of CRISPR/Cas9 and  
94 recombination technologies, enabling us to integrate DNA fragments up to 12 kb into  
95 the chromosome. We were also able to knock out DNA fragments up to 187 kb from  
96 the chromosome. Notably, the high performance of the technique was independent of  
97 high transformation efficiency, making the technique applicable to researchers of  
98 limited experience. Furthermore, the technique has been successfully applied in  
99 chromosomal simplification and metabolic engineering, demonstrating its potential as  
100 a genetic engineering tool for constructing genetically stable bacterial strains.

101

## 102 **Results**

### 103 **Development of CRISPR/Cas9-assisted recombination system (CARS)**

104 The CARS constructed in this study is a two-plasmid system that consists of five  
105 elements: a Cas9-expressing cassette induced by L-arabinose; an sgRNA-expressing  
106 cassette induced by L-arabinose; a  $\lambda$ -Red recombination system induced by  
107 isopropyl- $\beta$ -D-thiogalactopyranoside (IPTG); a donor DNA-generation system; and a  
108 plasmid curing system for eliminating the two plasmids independently or together  
109 from cells (Fig. 1).

110 Specifically, Cas9 protein and  $\lambda$ -Red recombinases (Gam, Beta, and Exo) were  
111 expressed by the p15A-P<sub>araB</sub>-Cas9-P<sub>T5</sub>-Red $\gamma\beta\alpha$  plasmid (plasmid#1), which contained  
112 a p15A replication origin and a kanamycin-resistant (Kan<sup>R</sup>) gene. Targeting sgRNA  
113 was expressed by the pSC101-P<sub>araB</sub>-sgRNA-Donor plasmid (plasmid#2) containing a  
114 pSC101 replication origin and an ampicillin-resistant (Amp<sup>R</sup>) gene (Fig. 1). There are  
115 two types of plasmid#2, the first of which contains two sgRNA-expressing cassettes,  
116 and the other containing one sgRNA-expression cassette. The variant of plasmid#2  
117 depends on the type of genomic editing. The *araB* promoter, which is strict and  
118 induced by L-arabinose, controlled Cas9 and sgRNA expression so that DNA cleavage  
119 was only initiated when the inducer was present. The T5 promoter, which is strong  
120 and induced by IPTG, controlled  $\lambda$ -Red recombinase expression to ensure  
121 homologous recombination took place in time after DNA cleavage. Donor DNA,  
122 which served as a template to introduce sequence deletions, insertions, or  
123 replacements, was constructed and integrated into the plasmid#2 (Fig. 1). The

124 plasmid-borne donor DNA could avoid nuclease attack and copy itself along with the  
125 replication of plasmid#2. The target site (N20 + PAM) on the genome was added to  
126 plasmid#2 in the flanks of donor DNA, thus the donor DNA could be cut off from  
127 plasmid#2 during genomic editing. This generated linear donor DNA that participated  
128 in homologous recombination with the cleaved genomic DNA (Fig. 1). At an  
129 appropriate concentration of L-arabinose, the expression levels of Cas9 and sgRNA  
130 were enough for cleaving the single-copy genome, but insufficient for cleaving all  
131 copies of the plasmid#2 (about five copies). Therefore, cells still possessed resistance  
132 to Amp. To construct the plasmid curing system, we used the temperature-sensitive  
133 pSC101 replication origin for plasmid#2 and added the sucrose-sensitive *sacB* gene to  
134 plasmid#1 as a counter-selection marker (Fig. 1).

135 Each cycle of editing started with the transfection of plasmid#2 into cells  
136 containing plasmid#1 (Fig. 1 and Figure S1). Then, we cultivated the correct  
137 transformants containing the two plasmids for cell reproduction before adding  
138 inducers to trigger DNA cleavage and DSB repair. Theoretically, sgRNA guides Cas9  
139 to recognize and cleave the target DNA, generating DSB in the genome and  
140 plasmid#2. Then, the  $\lambda$ -Red recombinases mediate homologous recombination  
141 between the broken genome and linear donor DNA. This transfers the desired  
142 mutation from the donor DNA to the genome, destroying the target site (Fig. 1 and  
143 Figure S1). The cells acquiring the desired mutation survive, and the cells with an  
144 unrepaired genome undergo cell death. Thus, plating liquid cultures on agar medium  
145 containing Kan and Amp allowed the selection of desired clones. Colonies growing

146 on the plates were further verified through PCR and sequencing. Then, correct  
147 mutants were cultivated at 40 °C in medium containing only Kan to eliminate  
148 plasmid#2 (Figure S2a). The cultures were inoculated into fresh medium to prepare  
149 competent cells for a new round of editing (Figure S1). Each cycle of editing required  
150 only three days. After the final round of editing, plasmid#1 and plasmid#2 were  
151 eliminated by incubating the correct clones at 40 °C in antibiotic-free medium and  
152 plating the cultures on agar medium containing sucrose (Figure S1 and Figure S2).

### 153 **CARS-mediated long fragment integration**

154 To evaluate the ability of CARS to mediate long fragment integration, we tried to  
155 insert fragments of different lengths (3 kb, 6 kb, 9 kb, and 12 kb) into the *lacZ* gene of  
156 *E. coli* strain MG1655 (Fig. 2a). We constructed four different versions of plasmid#2  
157 harboring the corresponding donor DNA and expressing the same sgRNA targeting  
158 the *lacZ* gene. The four inserted fragments came from the F plasmid of *E. coli* strain  
159 XL1-Blue, and they had no homology with the MG1655 genome. The insertion of  
160 these fragments would inactivate the *lacZ* gene encoding  $\beta$ -galactosidase. Thus, we  
161 could differentiate edited and unedited colonies via blue-white selection. The edited  
162 colonies were white in a Luria-Bertani (LB) plate containing IPTG and X-gal, while  
163 the unedited colonies were blue. We also identified edited clones though PCR. One  
164 pair of primers (F1/R1) was designed for the verification of 3-kb insertion (Fig. 2a),  
165 and correct clones obtained much larger PCR products than the control (Figure S3a).  
166 Two pairs of primers were designed for the verification of 6-kb, 9-kb, and 12-kb  
167 insertions (Fig. 2a). The correct clones obtained the desired PCR products using both



168 F1/R2 and F2-X/R1 (X=1, 2, 3), while the control did not (Figure S3b–d). The PCR  
169 products were further verified by sequencing. Based on the results of blue-white  
170 selection, PCR, and sequencing, we determined the editing efficiencies and positive  
171 rates. The editing efficiencies in these four insertion experiments were  $1.2 \times 10^{-3}$ ,  $1.2$   
172  $\times 10^{-3}$ ,  $9.6 \times 10^{-4}$ , and  $7.2 \times 10^{-4}$ , respectively (Fig. 2b). The positive rates in the four  
173 insertion experiments were 97.3%, 98.3%, 96.7%, and 98.3%, respectively (Fig. 2b).  
174 These results indicated that both Cas9-mediated DNA cleavage and  $\lambda$ -Red-mediated  
175 DSB repair were efficient in our experiments. We found that the small-proportion  
176 negative colonies (<5%), commonly called “escapers” [27, 28], came from two  
177 sources. More than half of the “escapers” did not undergo cleavage by Cas9, probably  
178 because of the limited induction time and intensity of L-arabinose. The remaining  
179 “escapers” acquired deletions of unknown length in the target site, which was likely  
180 due to the presence of A-EJ repair [29, 30]. We tried to insert a 15-kb fragment into  
181 the *lacZ* gene, but failed, because the corresponding plasmid#2, which was over 20 kb  
182 in size, was difficult to construct. The 12-kb insertion is sufficient for application in  
183 metabolic engineering. To highlight the advantages of our method, we compared  
184 CARS to three representative methods that performed relatively well in long fragment  
185 insertion. These data came from published articles [28, 31, 32]. Our method  
186 performed much better than the others when comparing both largest insertion length  
187 and positive rate (Fig. 2c).

#### 188 **CARS-mediated long fragment knockout**

189 Firstly, we successfully deleted a 99.9-kb fragment, starting at 565,156 and ending at

190 665,088, in the MG1655 genome (Fig. 3a). To determine the relationship between  
191 editing performance and the length of the deleted fragment, we selected seven  
192 fragments of different lengths within the 99.9-kb fragment for individual deletion.  
193 The lengths of these fragments were 9.1 kb, 21.5 kb, 30.6 kb, 39.4 kb, 59.8 kb, 79.8  
194 kb, and 99.9 kb (Fig. 3a). To delete these fragments, we constructed seven different  
195 versions of plasmid#2 harboring two sgRNA-expressing cassettes. One sgRNA targets  
196 the same site (TS1) in the genome, and the other targets different sites (TS2-1–TS2-7)  
197 (Fig. 3a). Based on the results of PCR and sequencing, we determined their editing  
198 efficiencies and positive rates (Fig. 3b). As demonstrated, all positive rates were over  
199 95%, similar to the results in long fragment insertion experiments. The deletion of  
200 9.1-kb, 21.5-kb, 30.6-kb, 39.4-kb, 59.8-kb, and 79.8-kb fragments resulted in similar  
201 editing efficiencies, and the deletion of the 99.9-kb fragment resulted in lower editing  
202 efficiencies (Fig. 3b). We found that the 99.9-kb fragment knockout strain grew much  
203 more slowly than MG1655, while the 79.8-kb fragment knockout strain had a similar  
204 growth rate to MG1655 (Figure S4a and S4d). This phenomenon implied that the  
205 terminal region of the 99.9-kb fragment contained some genetic information that was  
206 important, but not essential, for cell survival. The decrease in editing efficiency of the  
207 99.9-kb deletion experiment was probably due to the lower viability of edited cells. In  
208 this study, we also successfully deleted other long fragments in the genome (Fig. 4d).  
209 To highlight the advantages of our method, we compared CARS with four  
210 representative methods that performed relatively well in long fragment deletion. The  
211 data came from published articles [28, 33-35]. In comparison to these data, our

212 method performed much better in terms of both largest deletion length and positive  
213 rate (Fig. 3c).

#### 214 **Identification of nonessential sequence and chromosomal simplification**

215 According to previous reports, the MG1655 chromosome harbors 4497 genes,  
216 including 4296 protein-encoding genes and 201 RNA-encoding genes [36, 37].

217 Researchers at Keio University identified the essentiality of all protein-encoding  
218 genes in *E. coli* K-12 by single gene deletion, generating the Keio collection [38, 39].

219 This provided important information for us to identify potential nonessential long  
220 fragments in the MG1655 genome. To delete a long fragment, we needed to construct

221 a plasmid#2 that expressed a pair of sgRNA targeting two flanks of the fragment and  
222 harboring the corresponding donor DNA (Fig. 4a). To delete a long fragment

223 harboring a limited number of essential genes, we added these genes to the  
224 corresponding plasmid#2 between the two homologous arms. Therefore, the essential

225 genes remained in the chromosome after genomic editing, and the edited cells  
226 survived (Fig. 4b and 4c). For each long fragment deletion, we designed two pairs of

227 primers for PCR verification. The first primer pair targets DNA sequences within the  
228 long fragment, and the second primer pair targets the adjacent sequences outward the

229 two homologous arms (Fig. 4d and Figure S5). The correct clones did not obtain PCR  
230 product using the first primer pair, but obtained the corresponding PCR products

231 using the second. On the contrary, the unedited control clone obtained the  
232 corresponding PCR products using the first primer pair, but did not obtain PCR

233 products using the second (Fig. 4e and Figure S6).

234        Altogether, we successfully deleted twelve long nonessential fragments in the  
235        MG1655 genome (Table 1), including the 99.9-kb fragment (No. 3) mentioned in the  
236        previous section. These fragments are located in different regions of the genome, and  
237        their lengths range from 52.0 to 186.7 kb. Among the twelve fragments, No. 3, No. 8,  
238        and No. 11 harbor one essential gene; No. 1 and No. 4 harbor two essential genes; and  
239        No. 9 harbors three essential genes (Table 1). Based on the results of PCR and  
240        sequencing, we determined the editing efficiencies and positive rates (Fig. 4f). All  
241        positive rates were over 95%, and the editing efficiencies ranged from  $2.3 \times 10^{-4}$  to  
242         $1.3 \times 10^{-3}$ . The deletion of fragments No. 3, No. 4, and No. 7 led to much lower  
243        editing efficiencies than that from deletion of the other fragments. By measuring  
244        growth curves of the twelve knockout strains, we found that the No. 3, No. 4, and No.  
245        7 knockout strains grew much slower than other knockout strains, and the No. 4  
246        knockout strain grew slowest (Figure S4). This may have led to the lower editing  
247        efficiencies in the deletion experiments of fragments No. 3, No. 4, and No. 7. The  
248        results indicated that these fragments were important, but not essential, for cell  
249        growth.

250        After deleting twelve long fragments individually, we tried to construct cumulative  
251        deletion mutants. Here, we used MG1655- $\Delta$ No. X to represent the MG1655 mutant  
252        that loses fragment No. X (X=1, 2, 3, ..., 12). As No. 1 was the longest fragment  
253        deleted in this study (Table 1), we chose to construct cumulative deletion mutants on  
254        the basis of strain MG1655- $\Delta$ No. 1. Though iterative editing, we successfully deleted  
255        fragment No. 9 from MG1655- $\Delta$ No. 1, generating strain MG1655- $\Delta$ No. 1/ $\Delta$ No. 9 that

256 lost a total of 270.7 kb of the DNA sequence, containing 268 open reading frames  
257 (ORFs) (Fig. 4g). We then tried to delete a third fragment on the basis of  
258 MG1655- $\Delta$ No. 1/ $\Delta$ No. 9. According to the growth curves of single deletion mutants,  
259 the knockout of fragment No. 2, No. 5, No. 6, No. 8, No. 10, or No. 12 had no  
260 apparent influence on cell growth (Figure S4). Therefore, we attempted to delete these  
261 fragments individually in MG1655- $\Delta$ No. 1/ $\Delta$ No. 9. As a result, we successfully  
262 obtained strains MG1655- $\Delta$ No. 1/ $\Delta$ No. 9/ $\Delta$ No. 2, MG1655- $\Delta$ No. 1/ $\Delta$ No. 9/ $\Delta$ No. 5,  
263 and MG1655- $\Delta$ No. 1/ $\Delta$ No. 9/ $\Delta$ No. 6. The three knockout strains lost a total of 324.1  
264 kb, 370.6 kb, and 368.7 kb of the DNA sequence containing 315, 364, and 368 ORFs,  
265 respectively (Fig. 4g). We failed to knock out fragments No. 8, No. 10, and No. 12 in  
266 MG1655- $\Delta$ No. 1/ $\Delta$ No. 9 despite repeating the experiments several times, implying  
267 that these fragments were all essential for the survival of MG1655- $\Delta$ No. 1/ $\Delta$ No. 9.

## 268 **Metabolic engineering of *E. coli* for producing isobutanol**

269 Higher alcohols such as isobutanol and n-butanol show promise in becoming the next  
270 generation of biofuels, due to their higher energy density, higher vapor pressure, and  
271 relatively low hydroscopicity [40, 41]. To illustrate the potential application of CARS  
272 in metabolic engineering, we used the system to modify the *E. coli* chromosome for  
273 producing isobutanol. Firstly, we constructed a chassis strain named JW74 based on  
274 MG1655 with six rounds of genomic editing (Fig. 5a). The competency of JW74 was  
275 170-fold that of MG1655, making it much easier to transfect exogenous DNA. We  
276 then built a 7.9-kb operon and integrated it into the JW74 chromosome, thus  
277 displacing fragment No. 5 (Fig. 5a) and generating strain SH258. Fragment No. 5 was

278 99.9 kb in length, and the corresponding knockout strain grew slightly faster than its  
279 parental strain (Figure S4f). The operon consists of five structural genes and 5' and 3'  
280 untranslated regions (UTRs). The 5' UTR contains a strong bacterial  
281 ribosome-binding site [42] and a T7 promoter, which naturally controls the expression  
282 bacteriophage T7 RNA polymerase [43]; the 3' UTR contains a T7 terminator. The  
283 five structural genes are *alsS*, *ilvC*, *ilvD*, *kivD*, and *adhA* (Fig. 5a). Among the five  
284 genes, *ilvC* and *ilvD* came from *E. coli*, *alsS* came from *Bacillus subtilis* [44], and  
285 *kivD* and *adhA* came from *Lactococcus lactis* [45] (Fig. 5b). In order to initiate  
286 transcription of the operon, we introduced the T7 RNA polymerase-encoding gene  
287 controlled by the T5 promoter [46] to the SH258 genome, generating the SH274 strain  
288 (Fig. 5a). Though the T5 promoter is a strong inducible promoter repressed by LacI, it  
289 served here as a strong constitutive promoter. This is because SH274 is a  
290 *lacI*-defective strain. In traditional metabolic engineering, introducing a  
291 high-copy-number fermentation plasmid is a commonly used strategy to overexpress  
292 enzymes related to the target products. Therefore, we constructed the  
293 pColE1-P<sub>T5</sub>-*alsS-ilvC-ilvD-kivD-adhA* plasmid and transfected it into JW74,  
294 generating the SH279 strain.

295 We used the strains SH274 and SH279 to conduct micro-aerobic fermentation in  
296 shake flasks containing 20 mL M9 medium. Briefly, the acetolactate synthase (AlsS)  
297 converts pyruvate, the intermediate product of glycolysis, into 2-acetolactate. This is  
298 then transformed into 2,3-dihydroxy-isovalerate by ketol-acid reductoisomerase  
299 (IlvC). As the substrate of dihydroxyacid dehydratase (IlvD),

300 2,3-dihydroxy-isovalerate is converted into 2-ketoisovalerate, which is transformed  
301 into isobutyraldehyde by 2-ketoisovalerate decarboxylase (KivD). Finally,  
302 isobutyraldehyde is catalyzed by alcohol dehydrogenase (AdhA), generating isobutanol  
303 (Fig. 5b). During fermentation, samples were taken every 12 hours to measure the  
304 OD600 value and isobutanol titer (Fig. 5c). As a result, isobutanol reached a  
305 maximum titer of 1.3 g/L after 48 hours of SH274 fermentation (Fig. 5c). To our  
306 knowledge, this was the first attempt to produce isobutanol without introducing a  
307 high-copy-number fermentation plasmid, and isobutanol production was higher than  
308 many reports using such a plasmid [47, 48]. For strain SH279, isobutanol reached a  
309 maximum titer of 5.5 g/L after 48 hours (Fig. 5d). This is 4.2 fold that of SH274,  
310 indicating that the SH274 strain has much room for improvement. In future study, we  
311 therefore plan to increase the copy number of the operon  
312  $P_{T7}\text{-}alsS\text{-}ilvC\text{-}ilvD\text{-}kivD\text{-}adhA\text{-}T_{T7}$  in the SH274 genome to strengthen the expression  
313 of related enzymes.

314

## 315 **Discussion**

316 In this study, we developed CARS for genomic editing in *E. coli*. As a versatile tool,  
317 CARS is efficient for different kinds of genetic modifications, including sequence  
318 insertion, sequence deletion, and sequence displacement. The CARS is particularly  
319 suitable for long-fragment manipulation with a high editing efficiency and positive  
320 rate. With the aid of CARS, we were able to integrate DNA fragments up to 12 kb into  
321 the chromosome, and to knock out DNA fragments up to 187 kb from the

322 chromosome. In the 12-kb insertion experiment, the positive rate was 98.3%, and the  
323 editing efficiency was  $7.2 \times 10^{-4}$ . In the 187-kb deletion experiment, the positive rate  
324 was 97.7%, and the editing efficiency was  $1.2 \times 10^{-3}$ . Other researchers have  
325 conducted a significant amount of work on long-fragment editing in *E. coli* using the  
326 CRISPR/Cas9 technique. Li et al. developed a CRISPR/Cas9-assisted recombineering  
327 method that enabled the insertion of 8-kb exogenous DNA, yielding a positive rate of  
328 15% [28]. Utilizing a similar strategy, Chung et al. developed a method that enabled  
329 insertion of 7-kb exogenous DNA, and the positive rate was 61% in the presence of a  
330 selectable marker [31]. Li et al. reported a modified method that enabled consecutive  
331 insertion of DNA fragments, and the appropriate fragment size was 3–4 kb [32]. The  
332 system developed by Li et al. was also used to delete DNA fragments up to 12 kb, and  
333 the positive rate was 90% [28]. Zhao et al. described a method that enabled the  
334 deletion of DNA fragments up to 100 kb with a 75% positive rate, but a specific target  
335 site (N20 + PAM) must be integrated into chromosome through recombineering  
336 before inducing the deletion process [34]. Su et al. combined the CRISPR/Cas9  
337 system and *Mycobacterium tuberculosis*-derived non-homologous end-joining (NHEJ)  
338 system and completed the deletion of a 17-kb fragment in a homologous  
339 recombination-independent manner, with a 17% positive rate [33]. Similarly, Zheng et  
340 al. introduced a *Mycobacterium smegmatis*-derived NHEJ system and deleted a  
341 123-kb fragment with a 36% positive rate [35]. NHEJ-mediated methods generate  
342 stochastic DNA indels in the target region, which makes chromosome editing  
343 inaccurate. In these studies, the editing efficiencies ranged from  $10^{-7}$  to  $10^{-4}$  [30].



344 Compared with existing methods, CARS had a higher editing efficiency and positive  
345 rate. In addition, the high performance of CARS was independent of the  
346 high-competency host strain, making the technique applicable to experimenters of  
347 limited experience. Using this technique, “ $3N + 1$ ” days are sufficient for “ $N$ ” rounds  
348 of editing. To our knowledge, the 12 kb fragment inserted and the 187 kb fragment  
349 deleted in this study are the longest fragments manipulated in *E. coli* using  
350 CRISPR/Cas9 technology. Theoretically, CARS has the potential to be used for  
351 insertion of fragments over 12 kb, as long as one is able to construct a large  
352 plasmid#2 that is over 17 kb. Similarly, CARS has the potential to be used for  
353 deletion of fragments over 187 kb, as long as one can determine a fragment of this  
354 length that is nonessential for the survival of the host strain. At present, CARS can  
355 only manipulate one target in a single round of genetic editing. In future studies, we  
356 will try to upgrade the system to manipulate more targets at the same time.

357 As a powerful chromosome engineering tool, CARS has great application potential.  
358 In this study, to demonstrate its potential, we have applied CARS in genome  
359 simplification and metabolic engineering. *E. coli* has been the prominent prokaryotic  
360 organism in research laboratories since the origin of molecular biology, and is  
361 arguably the most completely characterized single-cell life form [49]. According to  
362 previous studies, different *E. coli* strains possess different genome sizes. For example,  
363 MG1655, an *E. coli* K-12 strain, has a 4.6-Mb genome that harbors 4497 genes,  
364 including 4296 protein-encoding genes and 201 RNA-encoding genes [36, 37].  
365 Functional analyses have shown that *E. coli* cells grown under given conditions use

366 only a fraction of their genes [50]. As Koob et al. have proposed, deletion of genes  
367 that are nonessential under a given set of growth conditions could identify a  
368 minimized set of essential *E. coli* genes and DNA sequences [51]. In past decades,  
369 researchers have explored nonessential sequences and removed them from the *E. coli*  
370 genome individually or cumulatively, trying to construct a minimized genome [1, 2,  
371 52, 53]. Though this work is extremely important, the methods utilized to delete  
372 nonessential sequences are very complicated and time-consuming. To remove a long  
373 fragment from the genome, researchers have tried all classical recombination  
374 techniques both alone or in combination, including Flp/*FRT*, Cre/*loxP*,  $\lambda$ -Red, Tn5  
375 transposon, and phage P1 transduction [1, 2, 52, 54]. Compared with these methods,  
376 the technique we proposed saves time and is simple to conduct. Using this technique,  
377 we have constructed twelve individual-deletion and four cumulative-deletion strains  
378 on the basis of MG1655, with the simplest genome lacking a 370.6 kb sequence  
379 containing 364 ORFs. Although some of the deletions generated could coexist in a  
380 single strain, many deletions that were viable individually were not viable when  
381 combined with other deletions. These results clearly indicate that some genes are not  
382 dispensable simultaneously, despite being dispensable individually. The genes  
383 belonging to this group may be those involved in alternative metabolic pathways. This  
384 observation also suggests that the number of essential genes is greater than estimated,  
385 and further illustrates the utility of our combinatorial-deletion approach for functional  
386 study of the *E. coli* genome.

387 Microorganisms are versatile living systems for achieving biosynthesis of valuable

388 molecules contributing to chemical, energy, and pharmaceutical processes [55-59].  
389 Plasmids have been commonly used for domesticating microbial materials to obtain  
390 desired cellular functions, due to simplicity of genetic manipulation. Inspired by  
391 nature, antibiotics have been widely used to minimize phenotype variation of  
392 plasmid-containing microbes. However, the use of antibiotics may result in  
393 multidrug-resistant species by horizontal gene transfer, and metabolic burden leading  
394 to suboptimal production of target compounds [4]. The addition of antibiotics not only  
395 increases the cost, but also contaminates final products in industrial settings.  
396 Chromosomal integration is a good alternative to plasmids and provides more stability  
397 for artificially introduced genetic information. The technique we developed is  
398 efficient for chromosomal integration. In this study, we integrated the isobutanol  
399 synthetic pathway into a chassis strain derived from MG1655, generating a  
400 genetically stable metabolic engineering strain that produced 1.3 g/L isobutanol in a  
401 shake flask. As expected, productivity of this engineering strain was lower than the  
402 strain containing a high-copy-number fermentation plasmid, mainly due to the low  
403 expression of related enzymes. In future studies, we will endeavor to increase  
404 isobutanol production by integrating more copies of the isobutanol synthetic pathway  
405 into the chromosome.

406

## 407 **Conclusions**

408 Overall, this study proposed an efficient chromosomal engineering tool for the  
409 insertion and deletion of long DNA fragments in *E. coli*, and demonstrated the tool's

410 potential in synthetic biology by successfully applying it in genome simplification and  
411 metabolic engineering.

412

## 413 **Methods**

### 414 **Strains and culture conditions**

415 *E. coli* strain DH5 $\alpha$  (American Type Culture Collection – ATCC® 68233™) served as  
416 the host strain for molecular cloning and plasmid manipulation. MG1655 (ATCC®  
417 47076™) served as the genetic material in editing experiments unless otherwise stated.  
418 Strains involved in this study are listed in Table S1. Verification primers used in  
419 genomic editing experiments are listed in Table S2. LB medium (10 g/L tryptone, 5  
420 g/L yeast extract, and 10 g/L NaCl) was used for cell growth in all cases unless  
421 otherwise noted. Solid medium contained 20 g/L agar. Super optimal broth with  
422 catabolite repression (SOC) medium (20 g/L tryptone, 5 g/L yeast extract, 0.5 g/L  
423 NaCl, 2.5 mM KCl, 10 mM MgCl<sub>2</sub>, 10 mM MgSO<sub>4</sub>, and 20 mM glucose) was used  
424 for cell recovery. M9 medium (6 g/L Na<sub>2</sub>HPO<sub>4</sub>, 3 g/L KH<sub>2</sub>PO<sub>4</sub>, 0.5 g/L NaCl, 1 g/L  
425 NH<sub>4</sub>Cl, 1 mM MgSO<sub>4</sub>, 0.1 mM CaCl<sub>2</sub>, 10 mg/L VB<sub>1</sub>, 40 g/L glucose, and 4 g/L yeast  
426 extract) was used for shake-flask fermentation. The working concentrations of Amp  
427 and Kan were 0.1 g/L and 0.025 g/L, respectively. The working concentrations of  
428 IPTG, X-gal, glucose, and sucrose in media or cultures were 1 mM, 0.1 g/L, 10 g/L,  
429 and 20 g/L, respectively. The working concentration of L-arabinose was 20 mM in  
430 liquid media and 5 mM in solid media. Details of reagents and media used in this  
431 study are listed in Table S3.

432 **Plasmid construction**

433 Plasmids involved in this study are listed in Table S4. Complete sequences of  
434 plasmids p15A-P<sub>araB</sub>-Cas9-P<sub>T5</sub>-Red $\gamma\beta\alpha$ , pSC101-P<sub>araB</sub>-sgRNA-Donor-T1,  
435 pSC101-P<sub>araB</sub>-sgRNA-Donor-T2, and pSC101-P<sub>araB</sub>-sgRNA-Donor-T3 are presented  
436 in Notes S1–S4. CRISPR target sequences designed in this study are listed in Table S5.  
437 The construction of plasmid pSC101-P<sub>araB</sub>-sgRNA-Donor was the key step in a  
438 specific genomic editing experiment. When constructing the  
439 pSC101-P<sub>araB</sub>-sgRNA-Donor plasmid containing one sgRNA expression chimera,  
440 pSC101-P<sub>araB</sub>-sgRNA-Donor-T1 served as the parental plasmid. First, a specifically  
441 designed donor DNA was integrated into pSC101-P<sub>araB</sub>-sgRNA-Donor-T1 to construct  
442 an intermediate plasmid. The donor DNA contained two homologous arms of  
443 approximately 500 bp. Then, a specific spacer (20 bp) was inserted into the  
444 intermediate plasmid between the *araB* promoter and the gRNA scaffold via single  
445 PCR and single Gibson Assembly. The spacer introduced by PCR served as the  
446 overlap in Gibson Assembly. When constructing the pSC101-P<sub>araB</sub>-sgRNA-Donor  
447 plasmid containing two sgRNA expression chimeras, pSC101-P<sub>araB</sub>-sgRNA-Donor-T2  
448 and pSC101-P<sub>araB</sub>-sgRNA-Donor-T3 served as the parental plasmids. First, a  
449 specifically designed donor DNA was integrated into pSC101-P<sub>araB</sub>-sgRNA-Donor-T2  
450 to construct an intermediate plasmid. Then, the intermediate plasmid and  
451 pSC101-P<sub>araB</sub>-sgRNA-Donor-T3 were combined to construct the  
452 pSC101-P<sub>araB</sub>-sgRNA-Donor plasmid through PCR and Gibson Assembly. The two  
453 specific spacers introduced by PCR served as overlaps in Gibson Assembly. Detailed

454 construction procedures of the pSC101-P<sub>araB</sub>-sgRNA-Donor plasmid are illustrated in  
455 Figure S7.

456 **Procedures of genomic editing, plasmids curing, and iterative editing**

457 First, the Kan<sup>R</sup> plasmid p15A-P<sub>araB</sub>-Cas9-P<sub>T5</sub>-Red $\gamma$  $\beta$  $\alpha$  (plasmid#1) was transfected  
458 into the target strain such as MG1655 to obtain the corresponding transformants such  
459 as MG1655/plasmid#1. A series of temperature-sensitive Amp<sup>R</sup> plasmids were  
460 constructed to express specific sgRNA and generate specific donor DNA, and these  
461 plasmids were generally named pSC101-P<sub>araB</sub>-sgRNA-Donor (plasmid#2). Then,  
462 specific plasmid#2 was transfected into the MG1655/plasmid#1 strain, and the  
463 MG1655/plasmid#1/plasmid#2 strain was screened in a LB plate with Amp, Kan, and  
464 glucose at 30 °C. One or several single colonies were inoculated into 2 mL LB  
465 medium, and the culture was cultivated at 30 °C for two hours. Then, 2  $\mu$ L Amp, 2  $\mu$ L  
466 Kan, and 20  $\mu$ L IPTG were added to the culture. After one hour, 20  $\mu$ L L-arabinose  
467 was added, and the cultures were cultivated for another three hours before plating. A  
468 1- $\mu$ L or 0.1- $\mu$ L aliquot of the culture was plated onto a LB plate containing Amp, Kan,  
469 and L-arabinose, and the plate was incubated overnight at 30 °C. Positive mutants  
470 were verified by colony PCR and sequencing. The flowchart of genomic editing is  
471 shown in Fig. 1 and Figure S1. The positive mutant was cultivated in LB medium in  
472 the presence of only Kan at 40 °C for 12 hours to remove the temperature-sensitive  
473 Amp<sup>R</sup> plasmid#2 (Figure S3a). Then, the obtained edited strain containing only  
474 plasmid#1 was used as the starting strain for the next round of genomic editing. The  
475 Kan<sup>R</sup> plasmid#1 is not stable in the host strain in the absence of Kan. When the final

476 round of genomic editing was completed, the edited strain was cultivated in LB  
477 medium without Kan at 40 °C for 12 hours to remove both Amp<sup>R</sup> plasmid#2 and  
478 sucrose-sensitive Kan<sup>R</sup> plasmid#1 (Figure S3b). The overnight culture was diluted for  
479 plating on a LB plate containing sucrose. Theoretically, colonies grown on the plate  
480 are plasmid-free. For further verification, single colonies were inoculated into LB  
481 medium with or without corresponding antibiotics. The flowchart of plasmid curing  
482 and iterative editing is shown in Figure S1.

#### 483 **Calculation of positive rate and editing efficiency**

484 One hundred colonies in the LB plate containing Amp, Kan, and L-arabinose were  
485 tested by colony PCR to screen for positive mutants. Twenty of the positive mutants  
486 were further verified via sequencing. The positive rate was calculated as the  
487 proportion of positive colonies to the total number of colonies. In blue-white selection  
488 experiments, positive colonies were also recognized by their color. White colonies  
489 were positive, and blue colonies were negative. One control group was set along with  
490 the experimental group to calculate editing efficiency. In the control group,  
491 L-arabinose was not added, and thus no Cas9 protein or sgRNA were expressed. All  
492 other conditions and processes were the same as for the experimental group. The  
493 editing efficiency was calculated as the proportion of positive colonies in the  
494 experimental group to the total number of colonies in the control group.

#### 495 **Measurement of growth curve and transformation efficiency**

496 For measuring the growth curve, one single colony was inoculated into 5 mL LB  
497 medium, and the culture was cultivated at 37 °C for 12 hours. Then, 1 mL seed liquid

498 was inoculated into 100 mL fresh LB medium, and the culture was cultivated at 37 °C  
499 in a 220-rpm shaker. During the 12-hour cultivation, samples were taken every hour  
500 to measure the optical density at a wavelength of 600 nm (OD600) of the culture  
501 using an ultraviolet spectrophotometer (V-5100, Shanghai Metash Instruments Co.,  
502 Ltd) at 600 nm. For measuring transformation efficiency, pure pUC19 was used as  
503 supercoiled DNA. First, 1 µL pUC19 (1 ng/µL) was added to one tube of competent  
504 cells (100 µL). Next, the mixture was incubated for 30 minutes before conducting  
505 heat-shock for one minute in a 42 °C water bath. Then, the tube was placed on ice for  
506 two minutes before adding 900 µL 37 °C SOC medium, and the tube was shaken at  
507 200–230 rpm (37 °C) for 40 minutes. Finally, 100 µL of the cultures were plated on a  
508 LB plate containing Amp, and the plate was incubated overnight at 37 °C. The  
509 transformation efficiency is  $N \times 10^4$  CFU/µg pUC19 (“*N*” refers to the number of  
510 transformants obtained in the plate).

#### 511 **Shake-flask fermentation and product detection**

512 For testing isobutanol production, single colonies of engineered strains were  
513 inoculated into 5 mL LB media containing the appropriate antibiotics, and the cultures  
514 were cultivated at 37 °C for 12 hours. Then, 200-µL seed liquid was transferred to  
515 airtight shake flasks containing 20 mL antibiotic-free M9 medium for micro-aerobic  
516 fermentation. During the 72-hour fermentation, samples were taken every 12 hours to  
517 test the biomass and the titer of isobutanol. Biomass was evaluated by measuring the  
518 OD600 of fermentation broth with an ultraviolet spectrophotometer (V-5100,  
519 Shanghai Metash Instruments Co., Ltd). For measuring isobutanol concentration, the



520 fermentation broth was centrifuged at  $1400 \times g$  for 10 minutes. The supernatant was  
521 tested via a gas chromatograph (PANNA GCA91, Shanghai Wangxu Electric Co.,  
522 Ltd), with high-purity isobutanol as the standard and high-purity n-pentanol as an  
523 internal reference.

524

## 525 **List of abbreviations**

526 PCR: polymerase chain reaction; DSB: double-strand break; dsDNA: double-stranded  
527 DNA; ZFN: zinc-finger nuclease; TALEN: transcription activator-like effector  
528 nuclease; CRISPR: clustered regularly interspaced short palindromic repeats; Cas9:  
529 CRISPR-associated protein 9; sgRNA: single-guide RNA; PAM: protospacer-adjacent  
530 motif; CARS: CRISPR/Cas9-assisted recombination system; IPTG:  
531 isopropyl- $\beta$ -D-thiogalactopyranoside; Kan<sup>R</sup>: kanamycin-resistant; Amp<sup>R</sup>:  
532 ampicillin-resistant; LB: Luria-Bertani; ORF: open reading frame; UTR: untranslated  
533 region; NHEJ: non-homologous end-joining; ATCC: American Type Culture  
534 Collection; SOC: super optimal broth with catabolite repression; OD600: optical  
535 density at a wavelength of 600 nm; TS: target site; LHA: left homologous arm; RHA:  
536 right homologous arm; F: forward primer; R: reverse primer.

537

## 538 **Declarations**

### 539 **Ethics approval and consent to participate**

540 Not applicable

### 541 **Consent for publication**

542 Not applicable

543 **Availability of data and materials**

544 All data generated or analyzed during this study are included in this published article.

545 **Competing interests**

546 The authors declared no conflicts of interests.

547 **Funding**

548 This work was jointly supported by the National Key R&D Program of China (No.

549 2019YFA0904100) and the National Natural Science Foundation of China (No.

550 31961133014)

551 **Authors' contributions**

552 Conceptualization: [Yi-Xin Huo]; Methodology: [Chaoyong Huang], [Liwei Guo];

553 Formal analysis and investigation: [Chaoyong Huang], [Liwei Guo], [Jingge Wang],

554 [Ning Wang]; Writing - original draft preparation: [Chaoyong Huang], [Liwei Guo];

555 Writing - review and editing: [Yi-Xin Huo]; Funding acquisition: [Yi-Xin Huo];

556 Resources: [Yi-Xin Huo]; Supervision: [Yi-Xin Huo]. All authors have read and

557 approved the final manuscript.

558 **Acknowledgements**

559 Not applicable

560 **Additional materials**

561 File name: Additional file 1

562 File format: .pdf

563 Title of data: Supplementary Figure 1–7, Supplementary Table 1–5, and

564 Supplementary Note 1–4.

565 Data description: Strains involved in this study are listed in Supplementary Table 1.

566 Verification primers used in genomic editing experiments are listed in Supplementary

567 Table 2. Details of reagents and media used in this study are listed in Supplementary

568 Table 3. Plasmids involved in this study are listed in Supplementary Table 4. CRISPR

569 target sequences designed in this study are listed in Supplementary Table 5. Complete

570 sequences of plasmids p15A-ParaB-Cas9-PT5-Red $\gamma\beta\alpha$ ,

571 pSC101-ParaB-sgRNA-Donor-T1, pSC101-ParaB-sgRNA-Donor-T2, and

572 pSC101-ParaB-sgRNA-Donor-T3 are presented in Supplementary Notes 1–4. Other

573 related data mentioned in the results section are presented in the Supplementary

574 Figures.

575

## 576 **References**

577 1. Kato J, Hashimoto M. Construction of consecutive deletions of the *Escherichia coli*

578 chromosome. *Mol Syst Biol.* 2007;3:132.

579 2. Kato J, Hashimoto M. Construction of long chromosomal deletion mutants of

580 *Escherichia coli* and minimization of the genome. *Methods Mol Biol.*

581 2008;416:279–293.

582 3. Shipman SL, Nivala J, Macklis JD, Church GM. CRISPR-Cas encoding of a digital

583 movie into the genomes of a population of living bacteria. *Nature.* 2017;547:345–349.

584 4. Mignon C, Sodoyer R, Werle B. Antibiotic-free selection in biotherapeutics: now and

585 forever. *Pathogens.* 2015;4:157–181.

- 586 5. Baudin A, Ozier-Kalogeropoulos O, Denouel A, Lacroute F, Cullin C. A simple and  
587 efficient method for direct gene deletion in *Saccharomyces cerevisiae*. *Nucleic Acids*  
588 *Res.* 1993;21:3329–3330.
- 589 6. Wilson RB, Davis D, Mitchell AP. Rapid hypothesis testing with *Candida albicans*  
590 through gene disruption with short homology regions. *J Bacteriol.*  
591 1999;181:1868–1874.
- 592 7. Russell CB, Thaler DS, Dahlquist FW. Chromosomal transformation of *Escherichia*  
593 *coli* recD strains with linearized plasmids *J Bacteriol.* 1989;171:2609–2613.
- 594 8. Link AJ, Phillips D, Church GM. Methods for generating precise deletions and  
595 insertions in the genome of wild-type *Escherichia coli*. application to open reading  
596 frame characterization. *J Bacteriol.* 1997;179:6228–6237.
- 597 9. Pósfai G, Kolisnychenko V, Bereczki Z, Blattner FR. Markerless gene replacement in  
598 *Escherichia coli* stimulated by a double-strand break in the chromosome. *Nucleic*  
599 *Acids Res.* 1999;27:4409–4415.
- 600 10. Sharan SK, Thomason LC, Kuznetsov SG, Court DL. Recombineering: a homologous  
601 recombination-based method of genetic engineering. *Nat Protoc.* 2009;4:206–223.
- 602 11. Jeong J, Cho N, Jung D, Bang D. Genome-scale genetic engineering in *Escherichia*  
603 *coli*. *Biotechnol Adv.* 2013;31:804–810.
- 604 12. Pines G, Freed EF, Winkler JD, Gill RT. Bacterial recombineering: genome  
605 engineering via phage-based homologous recombination. *ACS Synth Biol.*  
606 2015;4:1176–1185.
- 607 13. Datsenko KA, Wanner BL. One-step inactivation of chromosomal genes in

- 608           *Escherichia coli* K-12 using PCR products. Proc Natl Acad Sci USA.  
609           2000;97:6640–6645.
- 610    14.    Wang H, Bian X, Xia L, Ding X, Müller R, Zhang Y, Fu J, Stewart AF. Improved  
611           seamless mutagenesis by recombineering using *ccdB* for counterselection. Nucleic  
612           Acids Res. 2014;42:e37.
- 613    15.    Wang HH, Isaacs FJ, Carr PA, Sun ZZ, Xu G, Forest CR, Church GM. Programming  
614           cells by multiplex genome engineering and accelerated evolution. Nature.  
615           2009;460:894–898.
- 616    16.    Warner JR, Reeder PJ, Karimpour-Fard A, Woodruff LB, Gill RT. Rapid profiling of a  
617           microbial genome using mixtures of barcoded oligonucleotides. Nat Biotechnol.  
618           2010;28:856–862.
- 619    17.    Isaacs FJ, Carr PA, Wang HH, Lajoie MJ, Sterling B, Kraal L, Tolonen AC, Gianoulis  
620           TA, Goodman DB, Reppas NB, et al. Precise manipulation of chromosomes in vivo  
621           enables genome-wide codon replacement. Science. 2011;333:348–353.
- 622    18.    Tischer BK, von Einem J, Kaufer B, Osterrieder N. Two-step Red-mediated  
623           recombination for versatile high-efficiency markerless DNA manipulation in  
624           *Escherichia coli*. Biotechniques. 2006;40:191–197.
- 625    19.    Yu BJ, Kang KH, Lee JH, Sung BH, Kim MS, Kim SC. Rapid and efficient construction  
626           of markerless deletions in the *Escherichia coli* genome. Nucleic Acids Res.  
627           2008;36:e84.
- 628    20.    Yang J, Sun B, Huang H, Jiang Y, Diao L, Chen B, Xu C, Wang X, Liu J, Jiang W, et al.  
629           High-efficiency scarless genetic modification in *Escherichia coli* by using lambda red

- 630 recombination and I-SceI cleavage. *Appl Environ Microbiol.* 2014;80:3826–3834.
- 631 21. Urnov FD, Rebar EJ, Holmes MC, Zhang HS, Gregory PD. Genome editing with  
632 engineered zinc finger nucleases. *Nat Rev Genet.* 2010;11:636–646.
- 633 22. Joung JK, Sander JD. TALENs: a widely applicable technology for targeted genome  
634 editing. *Nat Rev Mol Cell Biol.* 2013;14:49–55.
- 635 23. Bogdanove AJ, Voytas DF. TAL effectors: customizable proteins for DNA targeting.  
636 *Science.* 2011;333:1843–1846.
- 637 24. Wood AJ, Lo TW, Zeitler B, Pickle CS, Ralston EJ, Lee AH, Amora R, Miller JC, Leung  
638 E, Meng X, et al. Targeted genome editing across species using ZFNs and TALENs.  
639 *Science.* 2011;333:307.
- 640 25. Jinek M, Chylinski K, Fonfara I, Hauer M, Doudna JA, Charpentier E. A programmable  
641 dual RNA-guided DNA endonuclease in adaptive bacterial immunity. *Science.*  
642 2012;337:816–821.
- 643 26. Gasiunas G, Barrangou R, Horvath P, Siksnyš V. Cas9-crRNA ribonucleoprotein  
644 complex mediates specific DNA cleavage for adaptive immunity in bacteria. *Proc Natl  
645 Acad Sci USA.* 2012;109:e2579–2586.
- 646 27. Jiang W, Bikard D, Cox D, Zhang F, Marraffini LA. RNA-guided editing of bacterial  
647 genomes using CRISPR-Cas systems. *Nat Biotechnol.* 2013;31:233–239.
- 648 28. Li Y, Lin Z, Huang C, Zhang Y, Wang Z, Tang Y, Chen T, Zhao H. Metabolic  
649 engineering of *Escherichia coli* using CRISPR–Cas9 mediated genome editing.  
650 *Metab Eng.* 2015;31:13–21.
- 651 29. Chayot R, Montagne B, Mazel D, Ricchetti M. An end-joining repair mechanism in

- 652 *Escherichia coli*. Proc Natl Acad Sci USA. 2010;107:2141–2146.
- 653 30. Huang C, Ding T, Wang J, Wang X, Guo L, Wang J, Zhu L, Bi C, Zhang X, Ma X, et al.  
654 CRISPR-Cas9-assisted native end-joining editing offers a simple strategy for efficient  
655 genetic engineering in *Escherichia coli*. Appl Microbiol Biotechnol.  
656 2019;103:8497–8509.
- 657 31. Chung ME, Yeh IH, Sung LY, Wu MY, Chao YP, Ng IS, Hu YC. Enhanced integration  
658 of large DNA into *E. coli* chromosome by CRISPR/Cas9. Biotechnol Bioeng.  
659 2017;114:172–183.
- 660 32. Li Y, Yan F, Wu H, Li G, Han Y, Ma Q, Fan X, Zhang C, Xu Q, Xie X, et al.  
661 Multiple-step chromosomal integration of divided segments from a large DNA  
662 fragment via CRISPR/Cas9 in *Escherichia coli*. J Ind Microbiol Biotechnol.  
663 2019;46:81–90.
- 664 33. Su T, Liu F, Gu P, Jin H, Chang Y, Wang Q, Liang Q, Qi Q. A CRISPR-Cas9 assisted  
665 non-homologous end-joining strategy for one-step engineering of bacterial genome.  
666 Sci Rep. 2016;6:37895.
- 667 34. Zhao D, Feng X, Zhu X, Wu T, Zhang X, Bi C. CRISPR/Cas9-assisted gRNA-free  
668 one-step genome editing with no sequence limitations and improved targeting  
669 efficiency. Sci Rep. 2017;7:16624.
- 670 35. Zheng X, Li SY, Zhao GP, Wang J. An efficient system for deletion of large DNA  
671 fragments in *Escherichia coli* via introduction of both Cas9 and the non-homologous  
672 end joining system from *Mycobacterium smegmatis*. Biochem Biophys Res.  
673 2017;485:768–774.

- 674 36. Keseler IM, Mackie A, Peralta-Gil M, Santos-Zavaleta A, Gama-Castro S,  
675 Bonavides-Martínez C, Fulcher C, Huerta AM, Kothari A, Krummenacker M, et al.  
676 EcoCyc: fusing model organism databases with systems biology. *Nucleic Acids Res.*  
677 2013;41:D605–D612.
- 678 37. Keseler IM, Mackie A, Santos-Zavaleta A, Billington R, Bonavides-Martínez C, Caspi  
679 R, Fulcher C, Gama-Castro S, Kothari A, Krummenacker M, et al. The EcoCyc  
680 database: reflecting new knowledge about *Escherichia coli* K-12. *Nucleic Acids Res.*  
681 2017;45:D513–D550.
- 682 38. Yamamoto N, Nakahigashi K, Nakamichi T, Yoshino M, Takai Y, Touda Y,  
683 Furubayashi A, Kinjyo S, Dose H, Hasegawa M, et al. Update on the Keio collection of  
684 *Escherichia coli* single-gene deletion mutants. *Mol Syst Biol.* 2009;5:335.
- 685 39. Baba T, Ara T, Hasegawa M, Takai Y, Okumura Y, Baba M, Datsenko KA, Tomita M,  
686 Wanner BL, Mori H. Construction of *Escherichia coli* K-12 in-frame, single-gene  
687 knockout mutants: the Keio collection. *Mol Syst Biol.* 2006;2:8.
- 688 40. Saini M, Wang ZW, Chiang CJ, Chao YP. Metabolic engineering of *Escherichia coli* for  
689 production of n-butanol from crude glycerol. *Biotechnol Biofuels.* 2017;10:173.
- 690 41. Liang S, Chen H, Liu J, Wen J. Rational design of a synthetic Entner-Doudoroff  
691 pathway for enhancing glucose transformation to isobutanol in *Escherichia coli*. *J Ind*  
692 *Microbiol Biotechnol.* 2018;45:187–199.
- 693 42. Elowitz MB, Leibler S. A synthetic oscillatory network of transcriptional regulators.  
694 *Nature.* 2000;403:335–338.
- 695 43. Rong M, He B, McAllister WT, Durbin RK. Promoter specificity determinants of T7



- 696 RNA polymerase. Proc Natl Acad Sci USA. 1998;95:515–519.
- 697 44. Atsumi S, Li Z, Liao JC. Acetolactate synthase from *Bacillus subtilis* serves as a  
698 2-ketoisovalerate decarboxylase for isobutanol biosynthesis in *Escherichia coli*. Appl  
699 Environ Microbiol. 2009;75:6306–6311.
- 700 45. Atsumi S, Hanai T, Liao JC. Non-fermentative pathways for synthesis of  
701 branched-chain higher alcohols as biofuels. Nature. 2008;451:86–89.
- 702 46. Bujard H, Gentz R, Lanzer M, Stueber D, Mueller M, Ibrahimi I, Haeuptle MT,  
703 Dobberstein B. A T5 promoter-based transcription-translation system for the analysis  
704 of proteins in vitro and in vivo. Methods Enzymol. 1987;155:416–433.
- 705 47. Chen CT, Liao JC. Frontiers in microbial 1-butanol and isobutanol production. FEMS  
706 Microbiol Lett. 2016;363:fnw020.
- 707 48. Lan EI, Liao JC. Microbial synthesis of n-butanol, isobutanol, and other higher  
708 alcohols from diverse resources. Bioresour Technol. 2013;135:339–349.
- 709 49. Blattner FR, Plunkett G, Bloch CA, Perna NT, Burland V, Riley M, Collado-Vides J,  
710 Glasner JD, Rode CK, Mayhew GF, et al. The complete genome sequence of  
711 *Escherichia coli* K-12. Science. 1997;277:1453–1462.
- 712 50. Tao H, Bausch C, Richmond C, Blattner FR, Conway T. Functional genomics:  
713 expression analysis of *Escherichia coli* growing on minimal and rich media. J Bacteriol.  
714 1999;181:6425–6440.
- 715 51. Koob MD, Shaw AJ, Cameron DC. Minimizing the Genome of *Escherichia coli*. Ann N  
716 Y Acad Sci. 1994;745:1–3.
- 717 52. Yu BJ, Sung BH, Koob MD, Lee CH, Lee JH, Lee WS, Kim MS, Kim SC. Minimization

- 718 of the *Escherichia coli* genome using a Tn5-targeted Cre/loxP excision system. Nat  
719 Biotechnol. 2002;20:1018–1023.
- 720 53. Hashimoto M, Ichimura T, Mizoguchi H, Tanaka K, Fujimitsu K, Keyamura K, Ote T,  
721 Yamakawa T, Yamazaki Y, Mori H, et al. Cell size and nucleoid organization of  
722 engineered *Escherichia coli* cells with a reduced genome. Mol Microbiol.  
723 2005;55:137–149.
- 724 54. Kang Y, Durfee T, Glasner JD, Qiu Y, Frisch D, Winterberg KM, Blattner FR.  
725 Systematic mutagenesis of the *Escherichia coli* genome. J Bacteriol.  
726 2004;186:4921–4930.
- 727 55. Paddon CJ, Keasling JD. Semi-synthetic artemisinin: a model for the use of synthetic  
728 biology in pharmaceutical development. Nat Rev Microbiol. 2014;12:355–367.
- 729 56. Fang H, Li D, Kang J, Jiang P, Sun J, Zhang D. Metabolic engineering of *Escherichia*  
730 *coli* for de novo biosynthesis of vitamin B<sub>12</sub>. Nat Commun. 2018;9:4917.
- 731 57. Yu Y, Zhu X, Xu H, Zhang X. Construction of an energy-conserving glycerol utilization  
732 pathways for improving anaerobic succinate production in *Escherichia coli*. Metab Eng.  
733 2019;56:181–189.
- 734 58. Huo YX, Ren H, Yu H, Zhao L, Yu S, Yan Y, Chen Z. CipA-mediated enzyme  
735 self-assembly to enhance the biosynthesis of pyrogallol in *Escherichia coli*. Appl  
736 Microbiol Biotechnol. 2018;102:10005–10015.
- 737 59. Huo YX, Cho KM, Rivera JG, Monte E, Shen CR, Yan Y, Liao JC. Conversion of  
738 proteins into biofuels by engineering nitrogen flux. Nat Biotechnol. 2011;29:346–351.  
739

740

741 **Table 1. Long fragments deleted in the MG1655 genome**

| Fragment No. | Starting site | End site  | Length  | Essential gene          |
|--------------|---------------|-----------|---------|-------------------------|
| No. 1        | 240,056       | 426,771   | 186,715 | <i>yagG, hemB</i>       |
| No. 2        | 499,529       | 552,955   | 53,426  | None                    |
| No. 3        | 565,456       | 665,088   | 99,932  | <i>entD</i>             |
| No. 4        | 990,473       | 1,127,061 | 136,588 | <i>fabA, serT</i>       |
| No. 5        | 1,449,596     | 1,549,490 | 99,894  | None                    |
| No. 6        | 1,549,491     | 1,647,484 | 97,993  | None                    |
| No. 7        | 2,349,152     | 2,430,141 | 80,989  | None                    |
| No. 8        | 2,442,420     | 2,517,306 | 74,886  | <i>argW</i>             |
| No. 9        | 2,822,534     | 2,906,555 | 84,021  | <i>ispF, ispD, ftsB</i> |
| No. 10       | 3,610,719     | 3,689,415 | 78,696  | None                    |
| No. 11       | 3,824,765     | 3,876,879 | 52,114  | <i>selC</i>             |
| No. 12       | 4,198,958     | 4,251,002 | 52,044  | None                    |

742

743 **Figure legends**

744 **Fig.1** Constitution of CARS and schematic of genomic editing. LHA: left

745 homologous arm. RHA: right homologous arm.

746 **Fig.2** CARS mediated long fragment integration. (a) Schematic of fragment

747 integration of different length. TS: target site. LHA: left homologous arm. RHA: right

748 homologous arm. F: forward primer. R: reverse primer. (b) Editing efficiencies and

749 positive rates in four editing experiments. (c) Comparison of largest insertion length

750 and positive rate between three reported methods and our method. Data are expressed

751 as means  $\pm$  s.d. from three independent experiments.

752 **Fig.3** CARS mediated long fragment knockout. (a) Schematic of fragment deletion of

753 different length. TS: target site. (b) Editing efficiencies and positive rates in seven

754 editing experiments. (c) Comparison of largest deletion length and positive rate

755 between four reported methods and our method. Data are expressed as means  $\pm$  s.d.

756 from three independent experiments.

757 **Fig.4** Deletion of nonessential sequence and chromosomal simplification. **(a)** Deletion

758 of long fragment containing no essential gene. **(b)** Deletion of long fragment

759 containing one essential gene. **(c)** Deletion of long fragment containing two essential

760 genes. **(d)** Schematic of the deletion of fragment No.1. LHA: left homologous arm.

761 RHA: right homologous arm. F: forward primer. R: reverse primer. **(e)** Representative

762 results of PCR verification in the deletion experiment of fragment No.1. **(f)** Results in

763 the deletion experiments of twelve nonessential fragments. **(g)** Summary of

764 cumulative deletion. Data are expressed as means  $\pm$  s.d. from three independent

765 experiments.

766 **Fig.5** Metabolic engineering of *E. coli* for producing isobutanol. **(a)** Construction of

767 strain SH274 in the basis of strain JW74. **(b)** The synthetic pathway of isobutanol

768 from glucose. **(c)** Results of isobutanol fermentation of strain SH274. **(d)** Results of

769 isobutanol fermentation of strain SH279. Data are expressed as means  $\pm$  s.d. from

770 three independent experiments.

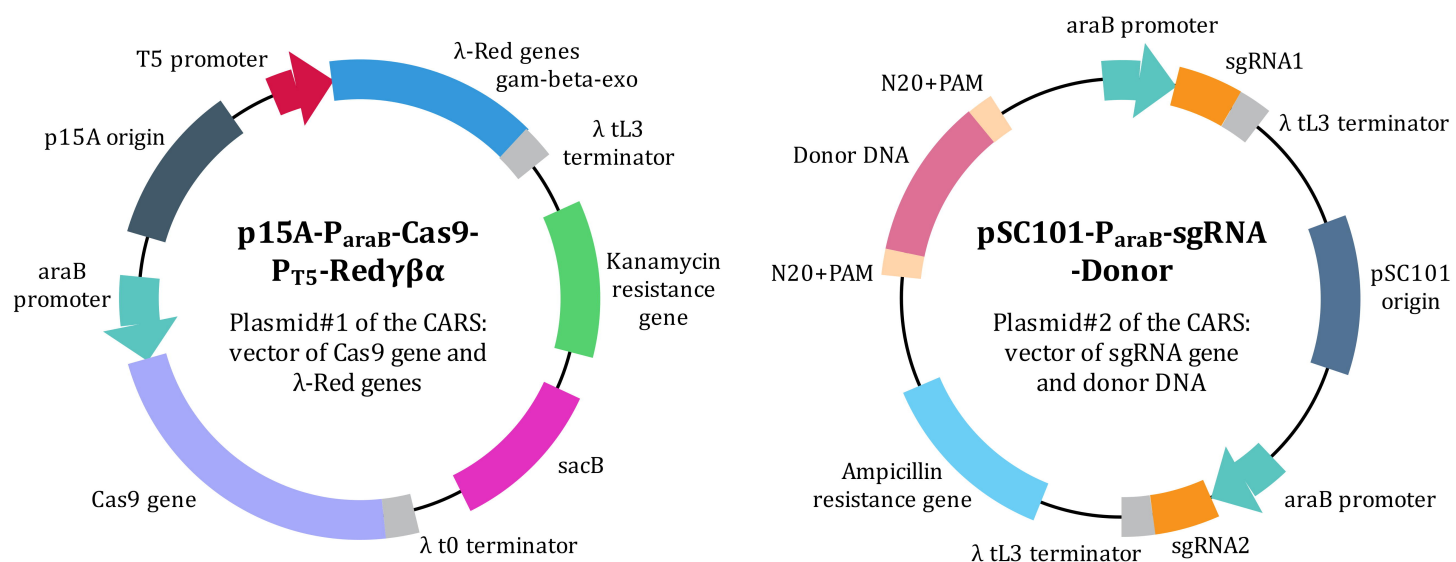

### Transfection

Plasmid#1 and plasmid#2 were transfected into the host individually or together

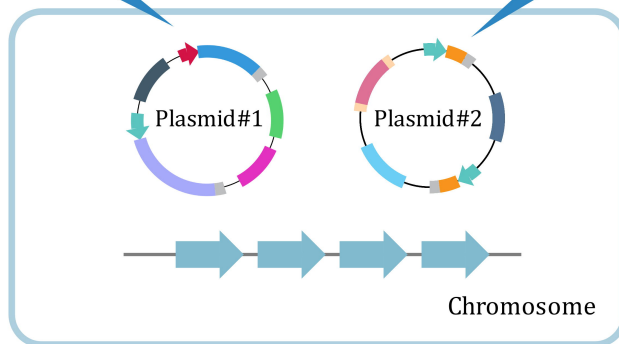

Plasmid#1 and plasmid#2 could coexist without killing their host before induction

Correct transformants copied themselves via cell reproduction

### Reproduction

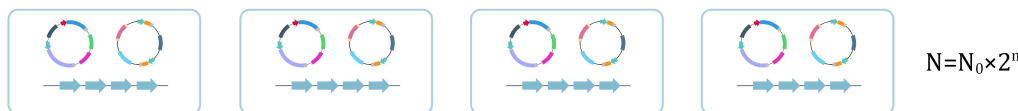

### Induction

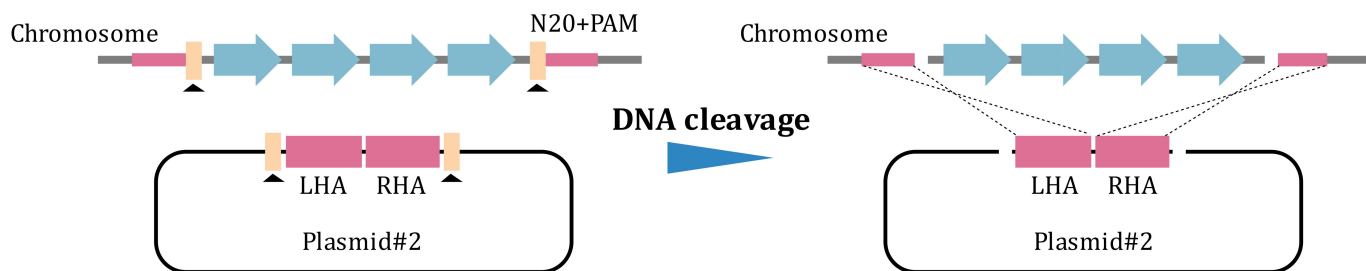

Both the chromosome and plasmid#2 were cleaved

λ-Red recombinases mediated the homologous recombination between the broken chromosome and linear donor DNA

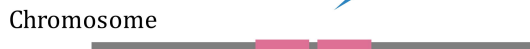

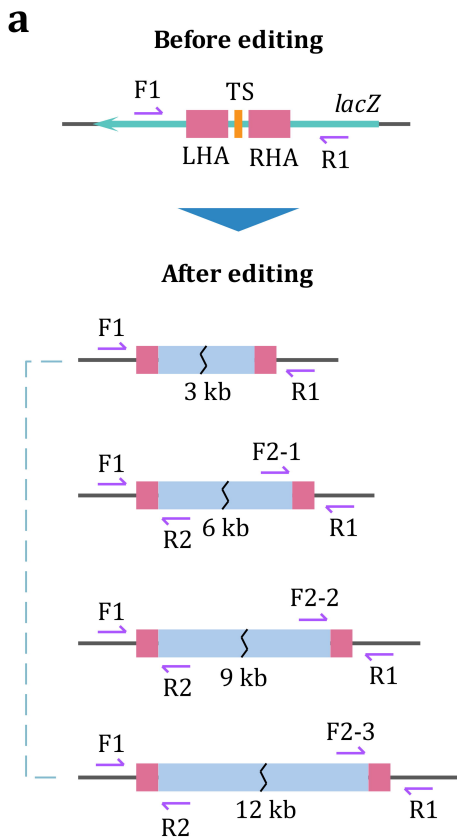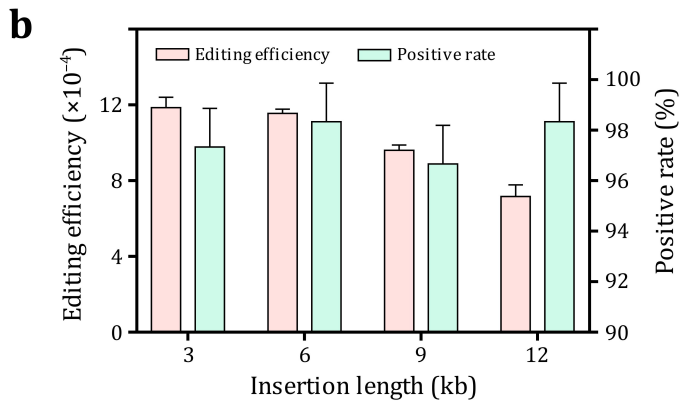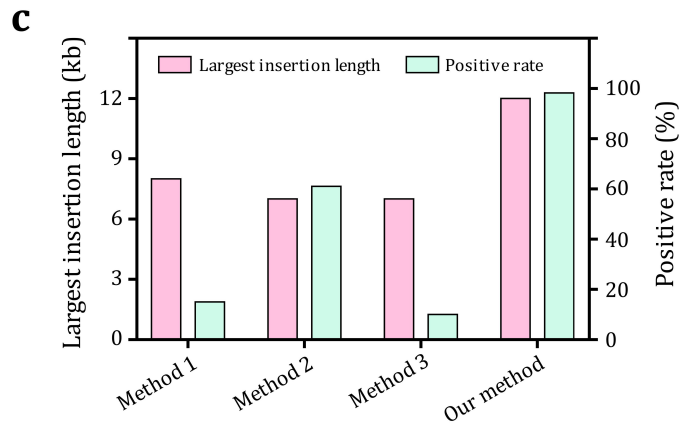

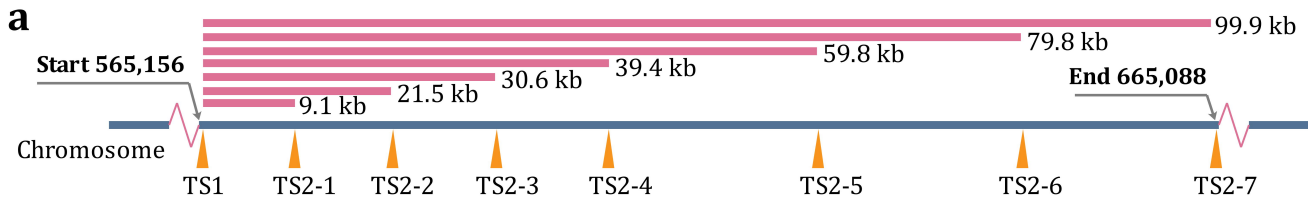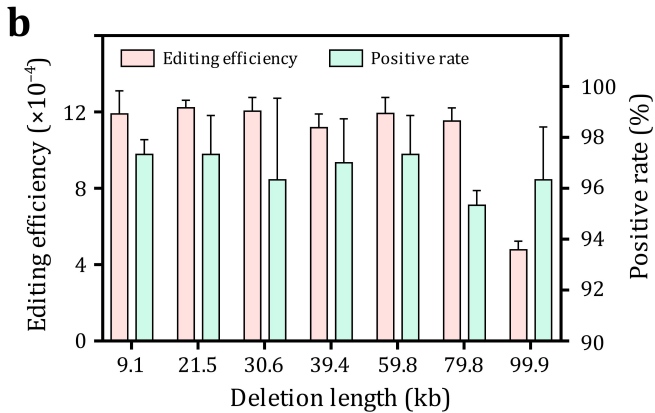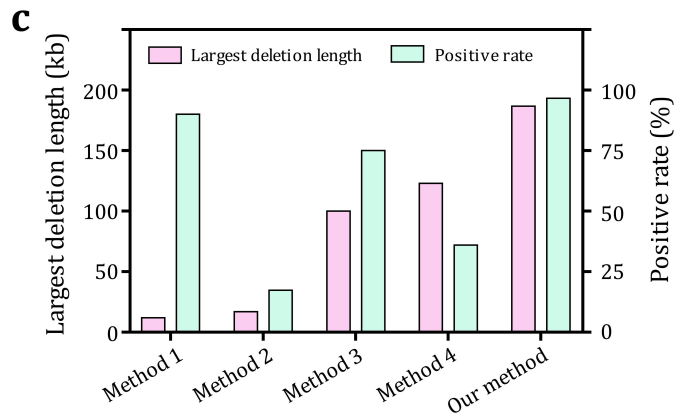



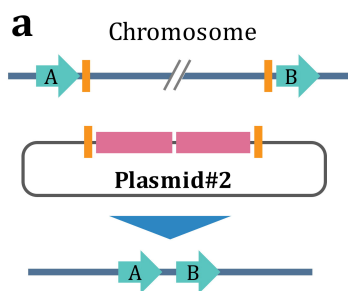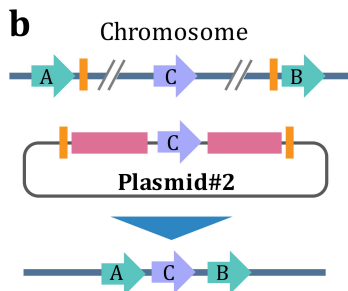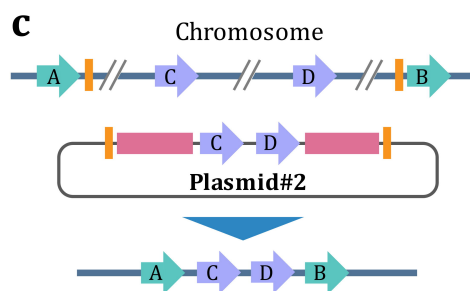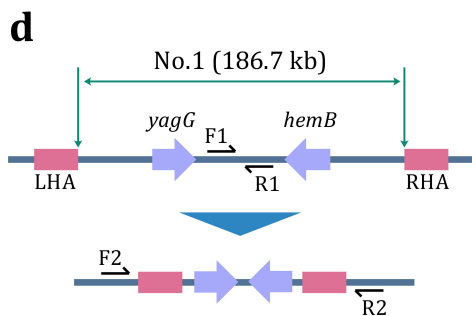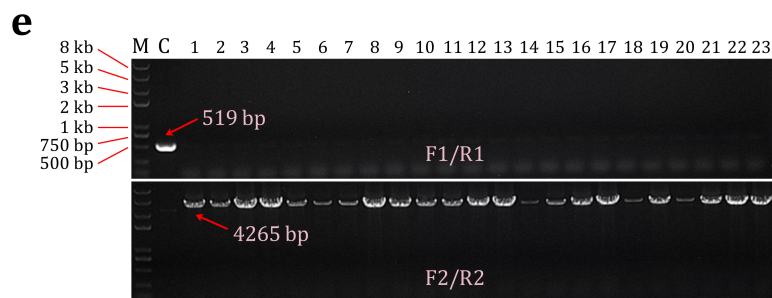

**f**

| Fragment No. | Length   | Editing efficiency               | Positive rate (%)  |
|--------------|----------|----------------------------------|--------------------|
| No.1         | 186.7 kb | $1.20 (\pm 0.09) \times 10^{-3}$ | 97.7 ( $\pm 2.6$ ) |
| No.2         | 53.4 kb  | $1.29 (\pm 0.02) \times 10^{-3}$ | 96.3 ( $\pm 1.2$ ) |
| No.3         | 99.9 kb  | $4.79 (\pm 0.36) \times 10^{-4}$ | 96.3 ( $\pm 1.7$ ) |
| No.4         | 136.6 kb | $2.31 (\pm 0.28) \times 10^{-4}$ | 95.0 ( $\pm 0.8$ ) |
| No.5         | 99.9 kb  | $1.28 (\pm 0.02) \times 10^{-3}$ | 95.0 ( $\pm 0.8$ ) |
| No.6         | 98.0 kb  | $1.19 (\pm 0.07) \times 10^{-3}$ | 96.0 ( $\pm 1.4$ ) |
| No.7         | 81.0 kb  | $4.44 (\pm 0.27) \times 10^{-4}$ | 98.0 ( $\pm 0.8$ ) |
| No.8         | 74.9 kb  | $1.22 (\pm 0.05) \times 10^{-3}$ | 95.0 ( $\pm 0.8$ ) |
| No.9         | 84.0 kb  | $1.14 (\pm 0.03) \times 10^{-3}$ | 97.7 ( $\pm 2.6$ ) |
| No.10        | 78.7 kb  | $1.16 (\pm 0.06) \times 10^{-3}$ | 95.7 ( $\pm 1.2$ ) |
| No.11        | 52.1 kb  | $1.09 (\pm 0.02) \times 10^{-3}$ | 96.7 ( $\pm 1.7$ ) |
| No.12        | 52.0 kb  | $1.22 (\pm 0.04) \times 10^{-3}$ | 97.0 ( $\pm 2.2$ ) |

**g**

| Cumulative deletion                           | Deleted length | ORF number |
|-----------------------------------------------|----------------|------------|
| $\Delta$ No.1 + $\Delta$ No.9                 | 270.7 kb       | 268        |
| $\Delta$ No.1 + $\Delta$ No.9 + $\Delta$ No.2 | 324.1 kb       | 315        |
| $\Delta$ No.1 + $\Delta$ No.9 + $\Delta$ No.5 | 370.6 kb       | 364        |
| $\Delta$ No.1 + $\Delta$ No.9 + $\Delta$ No.6 | 368.7 kb       | 368        |

**a**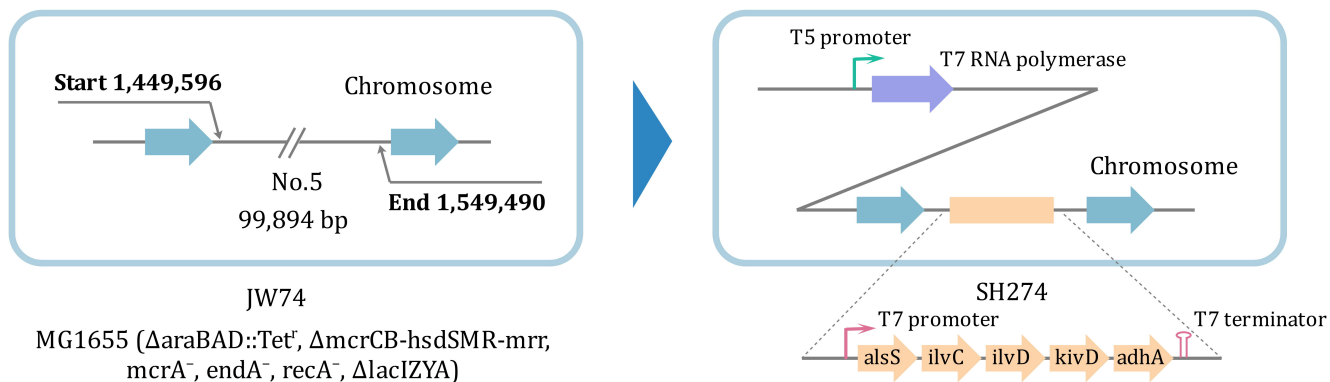**b**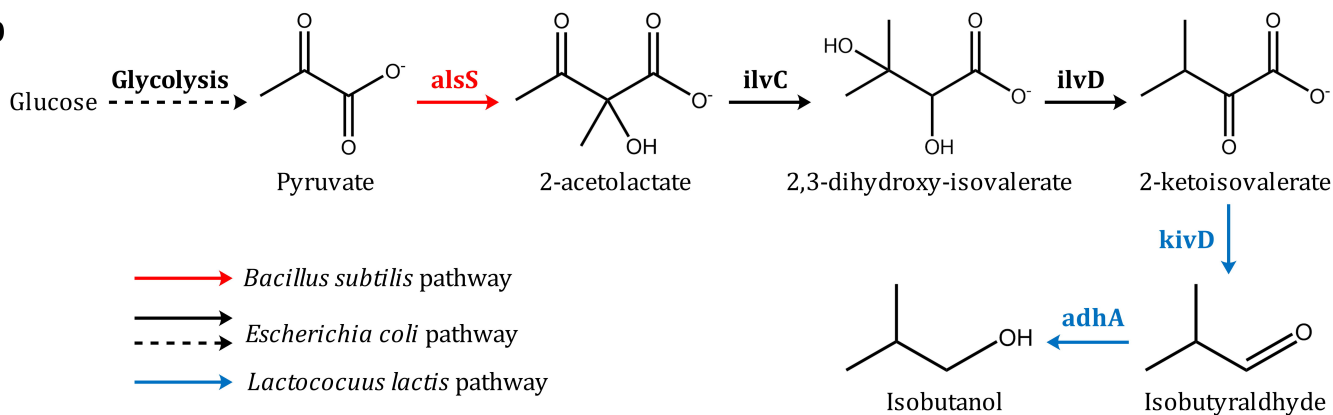**c**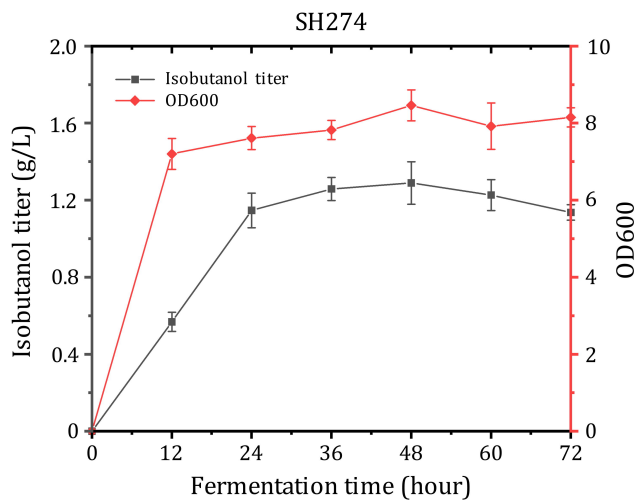**d**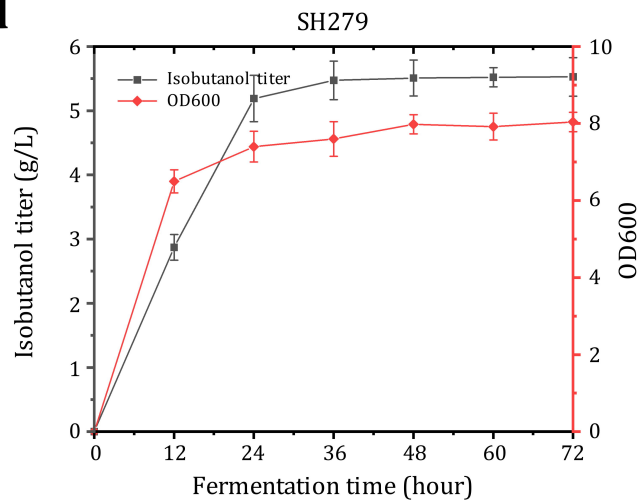

Source: http://biorxiv.org/content/10.1101/2020.01.28.922609v1.full.pdf
